# Supplementary material for: Redox flow batteries: a new frontier on energy storage
Source: Royal Society of Chemistry journal article supplement (doi:10.1039/d1se00839k), 2021-01-01
Supplement: d1se00839k1.pdf [file d1se00839k1.pdf]

## **Redox Flow Batteries: a new frontier on energy storage**

*P. Arévalo-Cid<sup>a(\*)</sup>, P. Dias<sup>a</sup>, A. Mendes<sup>a</sup>, J. Azevedo<sup>a(\*)</sup>*

(\*) Corresponding author

\*e-mail: pabloarevalo@tecnico.ulisboa.pt, jcazevedo@fe.up.pt

<sup>a</sup> LEPABE, Laboratory for Process Engineering, Environment, Biotechnology and Energy, Faculty of Engineering of the University of Porto, Rua Dr. Roberto Frias, 4200-465 Porto, Portugal.

**Supplemental material**

Table S1 – Summary of metal complexes used as RFBs active species.

| Complex                               | <i>E</i> (V)<br>(Charge)                                   | Reference<br>electrode | Electrolyte                                                                                                     | Ref. |
|---------------------------------------|------------------------------------------------------------|------------------------|-----------------------------------------------------------------------------------------------------------------|------|
| Acetylacetonate derivative            |                                                            |                        |                                                                                                                 |      |
| Co(acacen)                            | -0.2 (+/0)<br>-2.2 (0/-)                                   | Ag <sup>+</sup> /Ag    | 0.01 M Co(acacen) and 0.1 M TEAPF <sub>6</sub> in ACN                                                           | (1)  |
| Cr(acac) <sub>3</sub>                 | 0.5 (+/0)<br>-2.3 (0/-)                                    | Ag <sup>+</sup> /Ag    | 0.05 M Cr(acac) <sub>3</sub> and 0.5 M TEABF <sub>4</sub> in ACN                                                | (2)  |
| Mn(acac) <sub>3</sub>                 | 0.7 (+/0)<br>-0.4 (0/-)                                    | Ag <sup>+</sup> /Ag    | 0.05 M Mn(acac) <sub>3</sub> and 0.5 M TEABF <sub>4</sub> in ACN                                                | (3)  |
| Ru(acac) <sub>3</sub>                 | 1.0 (+/0)<br>-0.7 (0/-)                                    | SCE                    | 0.02 M [Ru(acac) <sub>3</sub> ] and 0.1 M Et <sub>4</sub> NBF <sub>4</sub> in ACN                               | (4)  |
| V(acac) <sub>3</sub>                  | 0.5 (+/0)<br>-1.7 (0/-)                                    | Ag <sup>+</sup> /Ag    | 0.01 M V(acac) <sub>3</sub> and 0.5 M TEABF <sub>4</sub> in ACN                                                 | (5)  |
| V(acac) <sub>3</sub>                  | 0.8 (+/0)<br>-1.25 (0/-)                                   | Ag <sup>+</sup> /Ag    | 0.01 M V(acac) <sub>3</sub> and 0.5 M TEABF <sub>4</sub> in Choline chloride: Ethylene glycol 1:2 (DES)         | (6)  |
| V(acac) <sub>3</sub>                  | 0.8 (+/0)<br>-1.4 (0/-)                                    | Ag <sup>+</sup> /Ag    | 0.005 M V(acac) <sub>3</sub> and 0.05 M TBAPF <sub>6</sub> in ACN-DMSO-1,3-DO mixture                           | (7)  |
| V(acac) <sub>3</sub>                  | 0.8 (+/0)<br>-1.4 (0/-)                                    | Ag <sup>+</sup> /Ag    | 0.01 M V(acac) <sub>3</sub> and 0.05 M TEABF <sub>4</sub> in ACN                                                | (8)  |
| V(acac) <sub>3</sub>                  | 0.90 (2+/+)<br>0.63 (+/0)<br>-1.37 (0/-)                   | Ag <sup>+</sup> /Ag    | 0.01 M V(acac) <sub>3</sub> in [C2C1Im][N(Tf <sub>2</sub> )] (IL)                                               | (9)  |
| UO <sub>2</sub> (acac) <sub>2</sub>   | -1.46 (0/-)                                                | Fc/Fc <sup>+</sup>     | 0.1 M TBAP in DMSO. (Concentration of UO <sub>2</sub> non specified)                                            | (10) |
| Pyridine derivatives                  |                                                            |                        |                                                                                                                 |      |
| [Co(bpy) <sub>3</sub> ] <sup>2+</sup> | -1.02 (2+/+)                                               | SCE                    | 0.1 M [Co(bpy) <sub>3</sub> ]Tf <sub>2</sub> and 0.4 M LiTf in EC:PC 1:1                                        | (11) |
| [Fe(bpy) <sub>3</sub> ] <sup>2+</sup> | 0.98 (3+/2+)                                               | SCE                    | 0.1 M [Fe(bpy) <sub>3</sub> ]Tf <sub>2</sub> and 0.4 M LiTf in EC:PC 1:1                                        | (11) |
| [Fe(bpy) <sub>3</sub> ] <sup>2+</sup> | 1.1 (3+/2+)<br>-1.3 (2+/+)<br>-1.5 (+/0)<br>-1.75 (0/-)    | SCE                    | 0.002 M [Fe(bpy) <sub>3</sub> ]BF <sub>4</sub> and 0.1 M Et <sub>4</sub> NBF <sub>4</sub> in ACN.               | (12) |
| [Fe(bpy) <sub>3</sub> ] <sup>2+</sup> | 0.59 (3+/2+)<br>-1.76 (2+/+)<br>-2.00 (+/0)<br>-2.29 (0/-) | SCE                    | 0.02 M Fe(Bpy) <sub>3</sub> (BF <sub>4</sub> ) <sub>2</sub> with 0.05 M TEABF <sub>4</sub> in PC                | (13) |
| [Ni(bpy) <sub>3</sub> ] <sup>2+</sup> | 1.0 (3+/2+)<br>-2.1 (2+/0)                                 | Ag <sup>+</sup> /Ag    | 0.04 M [Ni(bpy) <sub>3</sub> ] <sup>2+</sup> in BMPTFSA (IL)                                                    | (14) |
| [Ni(bpy) <sub>3</sub> ] <sup>2+</sup> | -1.70 (2+/0)                                               | Ag <sup>+</sup> /Ag    | 0.02 M Ni(Bpy) <sub>3</sub> (BF <sub>4</sub> ) <sub>2</sub> with 0.05 M TEABF <sub>4</sub> in PC                | (13) |
| [Ru(bpy) <sub>3</sub> ] <sup>2+</sup> | 1.0 (3+/2+)<br>-1.6 (2+/+)                                 | Ag <sup>+</sup> /Ag    | 0.02 M [Ru(bpy) <sub>3</sub> ](BF <sub>4</sub> ) <sub>2</sub> and 0.1 M Et <sub>4</sub> NBF <sub>4</sub> in ACN | (4)  |

| Complex                                  | <i>E</i> (V)<br>(Charge)                                                                    | Reference<br>electrode | Electrolyte                                                                                                        | Ref. |
|------------------------------------------|---------------------------------------------------------------------------------------------|------------------------|--------------------------------------------------------------------------------------------------------------------|------|
| [Ru(bpy) <sub>3</sub> ] <sup>2+</sup>    | 1.3 (3+/2+)<br>-1.35 (2+/+)<br>-1.55 (+/0)<br>-1.8 (0/-)                                    | SCE                    | 0.002 M [Ru(bpy) <sub>3</sub> ]BF <sub>4</sub> and 0.1 M Et <sub>4</sub> NBF <sub>4</sub> in ACN.                  | (12) |
| [bis(DIP) <sub>2</sub> Fe] <sup>2+</sup> | 0.8 (3+/2+)<br>-1.3 (2+/+)<br>-1.6 (+/0)                                                    | Fc/Fc <sup>+</sup>     | 0.6 mM [bis(DIP) <sub>2</sub> Fe][PF <sub>6</sub> ] <sub>2</sub> and 0.1 M nBu <sub>4</sub> PF <sub>6</sub> in ACN | (15) |
| [Cr(EstBpy) <sub>3</sub> ] <sup>3+</sup> | -0.18 (3+/2+)<br>-0.58 (2+/+)<br>-1.14 (+/0)<br>-1.66 (0/-)<br>-1.86 (-/2-)<br>-2.01(2-/3-) | Ag <sup>+</sup> /Ag    | 0.001 M [Cr(EstBpy) <sub>3</sub> ] <sup>3+</sup> and 0.1 M (TBA)BF <sub>4</sub> in ACN                             | (16) |
| [Co(AzPy2) <sub>2</sub> ] <sup>2+</sup>  | 0.16 (3+/2+)<br>-1.22 (2+/+)<br>-2.01 (+/0)                                                 | Fc/Fc <sup>+</sup>     | [Co(AzPy2) <sub>2</sub> ](PF <sub>6</sub> ) <sub>2</sub> and 0.1 M (TBA)PF <sub>6</sub> in ACN                     | (17) |
| <b>Metallocenes</b>                      |                                                                                             |                        |                                                                                                                    |      |
| FcN <sup>2+</sup>                        | 0.27 (2+/+)                                                                                 | Fc/Fc <sup>+</sup>     | 0.001 M FcN-TFSI and 1.0 M LiTFSI in ACN                                                                           | (18) |
| FcN <sup>2+</sup>                        | 0.55 (2+/+)                                                                                 | Ag <sup>+</sup> /Ag    | 0.01 M of FcNCl in 1 M NaCl                                                                                        | (19) |
| FcN <sup>2+</sup>                        | 0.61(2+/+)                                                                                  | NHE                    | 0.5 M for FcNCl in 2.0 M NaCl                                                                                      | (20) |
| FcN <sub>2</sub> <sup>3+</sup>           | 0.61 (3+/2+)                                                                                | NHE                    | 0.5 M for FcN <sub>2</sub> Br <sub>2</sub> in 2.0 M NaCl                                                           | (20) |
| FcPI                                     | 0.07 (+/0)<br>-1.87 (0/-)                                                                   | Fc/Fc <sup>+</sup>     | 0.01 M FcPI and 1.0 M (TBA)BF <sub>4</sub> in 1,3-dioxolane                                                        | (21) |
| BTMAP-Fc <sup>2+</sup>                   | 0.39 (3+/2+)                                                                                | NHE                    | 0.005 M BTMAP-FcCl <sub>2</sub> in 1.0 M NaCl                                                                      | (22) |
| BTMAP-Fc <sup>2+</sup>                   | 0.390 (3+/2+)                                                                               | SHE                    | 0.001 M BTMAP-FcCl <sub>2</sub> in 0.5 M NaCl                                                                      | (23) |
| Fc-Vi                                    | 0.15 (4+/3+)<br>-0.54(3+/2+)                                                                | Ag <sup>+</sup> /Ag    | 0.5 M Fc-ViCl <sub>3</sub> in 1 M NaCl                                                                             | (24) |
| Fc                                       | 3.6 (+/0)                                                                                   | Li <sup>+</sup> /Li    | 0.05 M FeCp <sub>2</sub> , 0.05 M FeCp <sub>2</sub> PF <sub>6</sub> , 0.5 M LiPF <sub>6</sub> in DMF               | (25) |
| CoCp <sub>2</sub>                        | 1.9 (0/-)                                                                                   | Li <sup>+</sup> /Li    | 0.05 M CoCp <sub>2</sub> , 0.5 M LiTFSI in 1,3-DO                                                                  | (25) |
| CoCp <sub>2</sub>                        | -1.23 (0/-)                                                                                 | Ag <sup>+</sup> /Ag    | 0.14 of [Co(Cp) <sub>2</sub> ] <sub>2</sub> PF <sub>6</sub> and 0.05 M TBAPF <sub>6</sub> in ACN                   | (26) |
| <b>Other used complexes</b>              |                                                                                             |                        |                                                                                                                    |      |
| [V(mnt)3] <sup>2-</sup>                  | 0,856 (4-/3-)<br>-0.227 (3-/2-)<br>-1.41 (2-/1-)                                            | SHE                    | 0.02 M [V(mnt)3]TBA <sub>2</sub> and 0.1 M [TBA][PF <sub>6</sub> ] in ACN                                          | (27) |
| [CrPDTA] <sup>-</sup>                    | -1.31 (-/2-)                                                                                | Ag <sup>+</sup> /Ag    | 0.005 M KCrPDTA in 0.125 M potassium tetraborate buffer (pH 9)                                                     | (28) |
| [Fe(AEDT)] <sup>-</sup>                  | -0.104 (-/2-)                                                                               | SCE                    | 0.1 M Fe(III)-EDTA and 1 M sodium acetate in water                                                                 | (29) |
| Fe(Ox) <sub>3</sub>                      | -0.190 (0/-)                                                                                | SCE                    | 0.1 M Fe(III)-oxalate and 1 M sodium acetate in water                                                              | (29) |

| Complex                              | <i>E</i> (V)<br>(Charge)     | Reference<br>electrode | Electrolyte                                                                               | Ref. |
|--------------------------------------|------------------------------|------------------------|-------------------------------------------------------------------------------------------|------|
| Fe(Cit)                              | -0.213 (0/-)                 | SCE                    | 0.1 M Fe(III)-citrate and 1 M sodium acetate in water                                     | (29) |
| Fe-TEA                               | -1.25                        | Ag <sup>+</sup> /Ag    | 0.001 M Fe-TEA in 1 M KOH                                                                 | (30) |
| Ni(Cyclam) <sup>3+</sup>             | -1.7 (3+/2+)<br>0.7 (2+/+)   | Fc/Fc <sup>+</sup>     | 0.01 M Ni(cyclam)[TFSI] <sub>2</sub> and 1.0 M TEABF <sub>4</sub> in EC:PC 1:1            | (31) |
| Ni([14]aneS4) <sup>3+</sup>          | 1.11 (3+/2+)<br>-0.80 (2+/+) | Fc/Fc <sup>+</sup>     | 0.3 M Ni([14]aneS4)[TFSI] <sub>2</sub> and 1.0 M LiPF <sub>6</sub> in EC:PC=1:1           | (32) |
| [Fe(CN) <sub>6</sub> ] <sup>4-</sup> | 0.49 (4-/3-)                 | NHE                    | 0.001 M K <sub>4</sub> [Fe(CN) <sub>6</sub> ] 1.0 M NaOH                                  | (33) |
| [Fe(CN) <sub>6</sub> ] <sup>4-</sup> | 0.3 (4-/3-)                  | Ag <sup>+</sup> /Ag    | 0.005 M K <sub>4</sub> Fe(CN) <sub>6</sub> in 0.125 M potassium tetraborate buffer (pH 9) | (28) |
| [Fe(CN) <sub>6</sub> ] <sup>4-</sup> | 0.496 (4-/3-)                | SHE                    | 0.01 M K <sub>4</sub> Fe(CN) <sub>6</sub> in 1 M KOH                                      | (34) |
| [Fe(CN) <sub>6</sub> ] <sup>4-</sup> | 0.29 (4-/3-)                 | Ag <sup>+</sup> /Ag    | 0.002 M K <sub>4</sub> Fe(CN) <sub>6</sub> in 1.0 M KOH.                                  | (35) |
| [Fe(CN) <sub>6</sub> ] <sup>4-</sup> | 0.53 (4-/3-)                 | SHE                    | 0.002 M K <sub>4</sub> Fe(CN) <sub>6</sub> in 1.0 M KOH.                                  | (36) |
| [Fe(CN) <sub>6</sub> ] <sup>4-</sup> | 0.50 (4-/3-)                 | SHE                    | 0.001 M K <sub>4</sub> Fe(CN) <sub>6</sub> in 1.0 M KOH.                                  | (37) |

Table S2 – Summary of most common organic/organometallic structures used as RFBs active species.

| General name              | Structure | Modifications                                                          | Abbreviature                  | Ref.       |
|---------------------------|-----------|------------------------------------------------------------------------|-------------------------------|------------|
| Acetylacetonate complexes |           |                                                                        |                               |            |
| Co(acacen)                |           | -                                                                      | -                             | (1)        |
| M(acac) <sub>3</sub>      |           | -                                                                      | -                             | [2-10]     |
| Pyridine complexes        |           |                                                                        |                               |            |
| [M(bpy)] <sup>n+</sup>    |           | R1 = H                                                                 | Bpy                           | [4, 11-14] |
|                           |           | R1 = -COOR                                                             | EstBpy                        | [16]       |
| [M(AzBpy)] <sup>n+</sup>  |           | R1 =<br>or<br>                                                         | AzBpy                         | [17]       |
| Metallocenes              |           |                                                                        |                               |            |
| Fc                        |           | R1 = CH <sub>2</sub> -N(CH <sub>3</sub> ) <sub>3</sub>                 | FcN <sup>+</sup>              | [18-20]    |
|                           |           | R1 =                                                                   | FcN <sub>2</sub> <sup>+</sup> | [20]       |
|                           |           | R1 =                                                                   | FcPI                          | [21]       |
|                           |           | R1 = (CH <sub>2</sub> ) <sub>3</sub> -N(CH <sub>3</sub> ) <sub>3</sub> | BTMAP-Fc                      | [22, 23]   |
|                           |           | R1 = H                                                                 | Fc                            | [25]       |

| General name                  | Structure                                                                           | Modifications                                                                            | Abbreviature          | Ref.          |
|-------------------------------|-------------------------------------------------------------------------------------|------------------------------------------------------------------------------------------|-----------------------|---------------|
| Quinones                      |                                                                                     |                                                                                          |                       |               |
| Benzoquinone                  | 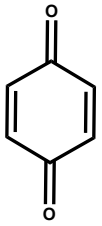   | -                                                                                        | BQ                    | (38-41)       |
| Naphtoquinone                 |    | -                                                                                        | NQ                    | (38,41)       |
| Anthraquinone                 |    | 2 x -SO <sub>3</sub> <sup>-</sup>                                                        | AQDS                  | (38,39,41,42) |
|                               |                                                                                     | 2 x -OH                                                                                  | AQDH                  | (38,41)       |
|                               |                                                                                     | Other                                                                                    | AQ                    | (38,41)       |
| Nitrogen-containing aromatics |                                                                                     |                                                                                          |                       |               |
| Viologen                      |  | R1 = CH <sub>3</sub>                                                                     | MV                    | (18,20,43,44) |
|                               |                                                                                     | R1 = (CH <sub>2</sub> ) <sub>3</sub> -N(CH <sub>3</sub> ) <sub>3</sub>                   | BTMAP-Fc              | (22,23,45)    |
| Nitroxides                    |  | R1 = H                                                                                   | TEMPO                 | (46-48)       |
|                               |                                                                                     | R1 = OH                                                                                  | TEMPOL                | (43,49)       |
|                               |                                                                                     | R1 = O-(CH <sub>2</sub> ) <sub>3</sub> -N(CH <sub>3</sub> ) <sub>3</sub>                 | TMAP-TEMPO            | (45)          |
|                               |                                                                                     | R1 =  | g <sup>+</sup> -TEMPO | (50)          |
|                               |                                                                                     | R1 =  | ImTEMPO               | (51)          |
| Other organic molecules       |                                                                                     |                                                                                          |                       |               |
|                               |  | -                                                                                        | DBMMB                 | (52-54)       |

Table S3 – Summary of the properties of the referred membranes.

| Membrane                                     | Thickness ( $\mu\text{m}$ ) | Electrolyte uptake (%) | IEC ( $\text{mmol}\cdot\text{g}^{-1}$ ) | Ion Conductivity ( $\text{mS}\cdot\text{cm}^{-1}$ ) | Area Resistance ( $\Omega\cdot\text{cm}^{-2}$ ) | Battery | Ref. |
|----------------------------------------------|-----------------------------|------------------------|-----------------------------------------|-----------------------------------------------------|-------------------------------------------------|---------|------|
| Cation-exchange membranes (CEM)              |                             |                        |                                         |                                                     |                                                 |         |      |
| Nafion212                                    | 50                          | 30.8                   | 0.88                                    | 72.4                                                | -                                               | VRFB    | (55) |
| Nafion117                                    | 215                         | 26.0                   | 0.97                                    | -                                                   | 1.14                                            | VRFB    | (56) |
| Nafion115                                    | 127                         | 25.8                   | 0.91                                    | -                                                   | 0.95                                            | VRFB    | (57) |
| Nafion212-cover PTFE                         | 45                          | 24.9                   | 0.69                                    | 68.1                                                | -                                               | VRFB    | (55) |
| Nafion117-SiO <sub>2</sub> -TiO <sub>2</sub> | 217                         | 22.5                   | 0.95                                    | -                                                   | 1.26                                            | VRFB    | (56) |
| Nafion117-SiO <sub>2</sub>                   | 204                         | 21.5                   | 0.96                                    | 56.2                                                | -                                               | VRFB    | (58) |
| Nafion117-TiO <sub>2</sub>                   | 90                          | 19.13                  | 0.85                                    | -                                                   | 1.05                                            | VRFB    | (59) |
| SPEEK (DS = 40)                              | 90                          | 26.7                   | 1.45                                    | -                                                   | 1.22                                            | VRFB    | (57) |
| SPEEK-SBA15 20%                              | 61                          | 31.8                   | 1.72                                    | 6.4                                                 | -                                               | VRFB    | (60) |
| SPEEK-Graphene                               | 90                          | 50.9                   | 1.98                                    | 14.1                                                | 1.28                                            | VRFB    | (61) |
| NafionR1000-SPEEK                            | 100                         | -                      | 1.67                                    | -                                                   | 1.6                                             | VRFB    | (62) |
| Sulfonated-PFAE                              | 55-64                       | 48                     | 1.8                                     | 61                                                  | -                                               | VRFB    | (63) |
| Anion-exchange membranes (AEM)               |                             |                        |                                         |                                                     |                                                 |         |      |
| QPEK                                         | 45-55                       | 87                     | 2.3                                     | 15.2                                                | -                                               | V-Ce    | (64) |
| Q-adamantane-PAEK                            | 40-45                       | 18.8                   | 1.75                                    | -                                                   | 0.49                                            | VRFB    | (65) |
| Phthalazinone-PAEK                           | 47                          | 23.8                   | 1.53                                    | -                                                   | 0.58                                            | VRFB    | (66) |
| Q-Radel®                                     | 55-60                       | 73                     | 2.5                                     | 49                                                  | -                                               | VRFB    | (67) |
| Imidazolium-Udel®                            | 60                          | 20                     | -                                       | 24                                                  | -                                               | VRFB    | (68) |
| Benzophenone-Q- Udel®                        | 70                          | 60.3                   | 1.74                                    | -                                                   | -                                               | VRFB    | (69) |
| QPS-PVDF                                     | 130                         | 22                     | 2.1                                     | 2.2                                                 | -                                               | VRFB    | (70) |
| P(QVBC-St-HEA)                               | 70                          | 37.5                   | 1                                       | 2.2                                                 | 3                                               | VRFB    | (71) |
| TEA-VBC                                      | 37                          | 43.8                   | 1.09                                    | 29.6                                                | -                                               | NAVRFB  | (72) |
| VI-co-TFEMA-co-DVB                           | 150                         | -                      | 1                                       | -                                                   | 2.8                                             | VRFB    | (73) |

| Membrane                                 | Thickness ( $\mu\text{m}$ ) | Electrolyte uptake (%) | IEC ( $\text{mmol}\cdot\text{g}^{-1}$ ) | Ion Conductivity ( $\text{mS}\cdot\text{cm}^{-1}$ ) | Area Resistance ( $\Omega\cdot\text{cm}^{-2}$ ) | Battery | Ref. |
|------------------------------------------|-----------------------------|------------------------|-----------------------------------------|-----------------------------------------------------|-------------------------------------------------|---------|------|
| P(TPP-TFAP)                              | 50                          | 35                     | 2.13                                    | 9.4                                                 | 0.53                                            | VRFB    | (74) |
| Urushi-chitosan                          | 29                          | 75                     | 0.59                                    | 6.4                                                 | -                                               | NAVRFB  | (75) |
| Urushi-PDDA                              | 45                          | -                      | -                                       | 130                                                 | -                                               | NAVRFB  | (76) |
| Amphoteric ion-exchange membranes (AIEM) |                             |                        |                                         |                                                     |                                                 |         |      |
| PSSS-Selemion®                           | -                           | -                      | 1.74                                    | -                                                   | 1.25                                            | VRFB    | (77) |
| SPEEK-QPEI                               | 60                          | 39.97                  | 1.553                                   | 47.37                                               | 0.158                                           | VRFB    | (78) |
| PTFE-QAPSF-SPEEK                         | -                           | 73                     | 0.9 (+)/4.5 (-)                         | 10.27                                               | -                                               | VRFB    | (79) |
| ImSPEEK                                  | 80                          | 45                     | 1.78                                    | 70                                                  | -                                               | VRFB    | (80) |
| ImPSf-SPEEK                              | 65                          | 56                     | 2.04                                    | 135                                                 | 0.48                                            | VRFB    | (81) |
| N-morpholine-SPSt                        | 150                         | 21                     | 0.62 (+)/1.11 (-)                       | 31.2                                                | -                                               | VRFB    | (82) |
| Acid-doped membranes (ADM)               |                             |                        |                                         |                                                     |                                                 |         |      |
| H <sub>2</sub> SO <sub>4</sub> -PBI      | 15                          | 6-12                   | -                                       | 4.9                                                 | 1.62                                            | VRFB    | (83) |
| PBI-SPAEEK                               | 64                          | -                      | 1.56                                    | -                                                   | 11.9                                            | VRFB    | (84) |
| PAES-PBI                                 | 50                          | 23.8-26.6              | 1.75                                    | -                                                   | 0.1-0.25                                        | VRFB    | (85) |
| PBI-SPEEK                                | -                           | 43.63                  | -                                       | -                                                   | 0.4                                             | VRFB    | (86) |
| PBI-Nafion                               | 4                           | -                      | -                                       | -                                                   | 0.56                                            | VRFB    | (87) |
| SPBI-DCDPE-APTA                          | -                           | 47.4                   | 3.15                                    | 32                                                  | -                                               | VRFB    | (88) |
| P(SSS-DMAEMA-VDF)                        | 50                          | 14                     | 0.65                                    | -                                                   | 65                                              | VRFB    | (89) |
| SPEEK-Graphene-NH <sub>2</sub>           | 60                          | 29.59                  | 2.07                                    | -                                                   | 0.154                                           | VRFB    | (90) |
| SPI/PEI-rGO                              | 50                          | 44.2                   | 1.16                                    | 6.2                                                 | -                                               | VRFB    | (91) |
| SPEEK-poly(etheimide)                    |                             | 32.9                   | 1.38                                    | 72                                                  | -                                               | VRFB    | (92) |
| SPFEKA                                   | 140-180                     | 36.5                   | 1.47                                    | 10.8                                                | -                                               | VRFB    | (93) |
| Size-exclusion porous membranes (SEPM)   |                             |                        |                                         |                                                     |                                                 |         |      |
| PAN                                      | -                           | -                      | -                                       | -                                                   | -                                               | VRFB    | (94) |
| PVDF                                     | 155                         | -                      | -                                       | -                                                   | 1.50                                            | VRFB    | (95) |
| Silicalite                               | 5-8                         | -                      | -                                       | -                                                   | 10.8                                            | VRFB    | (96) |
| ZSM-35 zeolite                           | 8                           | -                      | -                                       | -                                                   | 0.61                                            | VRFB    | (97) |



| <b>Membrane</b>  | <b>Thickness<br/>(<math>\mu\text{m}</math>)</b> | <b><i>Electrolyte uptake (%)</i></b> | <b><i>IEC (<math>\text{mmol}\cdot\text{g}^{-1}</math>)</i></b> | <b>Ion Conductivity<br/>(<math>\text{mS}\cdot\text{cm}^{-1}</math>)</b> | <b>Area Resistance<br/>(<math>\Omega\cdot\text{cm}^{-2}</math>)</b> | <b>Battery</b> | <b>Ref.</b> |
|------------------|-------------------------------------------------|--------------------------------------|----------------------------------------------------------------|-------------------------------------------------------------------------|---------------------------------------------------------------------|----------------|-------------|
| TiO <sub>2</sub> | 2                                               | -                                    | -                                                              | -                                                                       | 1.29                                                                | VRFB           | (98)        |

## References

1. Zhang D, Lan H, Li Y. The application of a non-aqueous bis(acetylacetonate)ethylenediamine cobalt electrolyte in redox flow battery. *J Power Sources* [Internet]. 2012;217:199–203. Available from: <http://dx.doi.org/10.1016/j.jpowsour.2012.06.038>
2. Liu Q, Shinkle AA, Li Y, Monroe CW, Thompson LT, Sleightholme AES. Non-aqueous chromium acetylacetonate electrolyte for redox flow batteries. *Electrochem commun* [Internet]. 2010;12(11):1634–7. Available from: <http://dx.doi.org/10.1016/j.elecom.2010.09.013>
3. Sleightholme AES, Shinkle AA, Liu Q, Li Y, Monroe CW, Thompson LT. Non-aqueous manganese acetylacetonate electrolyte for redox flow batteries. *J Power Sources* [Internet]. 2011;196(13):5742–5. Available from: <http://dx.doi.org/10.1016/j.jpowsour.2011.02.020>
4. Matsuda Y, Tanaka K, Okada M, Takasu Y, Morita M, Matsumura-Inoue T. A rechargeable redox battery utilizing ruthenium complexes with non-aqueous organic electrolyte. *J Appl Electrochem*. 1988;18(6):909–14.
5. Liu Q, Sleightholme AES, Shinkle AA, Li Y, Thompson LT. Non-aqueous vanadium acetylacetonate electrolyte for redox flow batteries. *Electrochem commun* [Internet]. 2009;11(12):2312–5. Available from: <http://dx.doi.org/10.1016/j.elecom.2009.10.006>
6. Bahadori L, Hashim MA, Manan NSA, Mjalli FS, Alnashef IM, Brandon NP, et al. Investigation of ammonium- And phosphonium-based deep eutectic solvents as electrolytes for a non-aqueous all-vanadium redox cell. *J Electrochem Soc*. 2016;163(5):A632–8.
7. Herr T, Fischer P, Tübke J, Pinkwart K, Elsner P. Increasing the energy density of the non-aqueous vanadium redox flow battery with the acetonitrile-1,3-dioxolane-dimethyl sulfoxide solvent mixture. *J Power Sources* [Internet]. 2014;265:317–24. Available from: <http://dx.doi.org/10.1016/j.jpowsour.2014.04.141>
8. Shinkle AA, Sleightholme AES, Thompson LT, Monroe CW. Electrode kinetics in non-aqueous vanadium acetylacetonate redox flow batteries. *J Appl Electrochem*. 2011;41(10):1191–9.
9. Ejigu A, Greatorex-Davies PA, Walsh DA. Room temperature ionic liquid electrolytes for redox flow batteries. *Electrochem commun* [Internet]. 2015;54:55–9. Available from: <http://dx.doi.org/10.1016/j.elecom.2015.01.016>
10. Yamamura T, Shiokawa Y, Yamana H, Moriyama H. Electrochemical investigation of uranium  $\beta$ -diketonates for all-uranium redox flow battery. *Electrochim Acta*. 2002;48(1):43–50.
11. Meda L, Oldani F, Tozzola G, Caramori S, Benazzi E, Cristino V, et al. Searching for new redox-complexes in organic flow batteries.

Solid State Ionics [Internet]. 2018;317(September 2017):142–8. Available from: <https://doi.org/10.1016/j.ssi.2018.01.017>

12. Morita M, Tanaka Y, Tanaka K, Matsuda Y, Matsumura-Inoue T. Electrochemical oxidation of Ruthenium and Iron Complexes at Rotating Disk Electrode in Acetonitrile Solution. *Bull Chem Soc Jpn.* 1988;61:2711–4.
13. Mun J, Lee MJ, Park JW, Oh DJ, Lee DY, Doo SG. Non-aqueous redox flow batteries with nickel and iron tris(2,2' -bipyridine) complex electrolyte. *Electrochem Solid-State Lett.* 2012;15(6):80–3.
14. Katayama Y, Toshimitsu Y, Miura T. Electrode Kinetics of the Redox Reaction of Tris(2,2'-bipyridine) nickel Complexes in an Ionic Liquid. *Electrochim Acta* [Internet]. 2014;131:36–41. Available from: <http://dx.doi.org/10.1016/j.electacta.2013.12.087>
15. Duarte GM, Braun JD, Giesbrecht PK, Herbert DE. Redox non-innocent bis(2,6-diimine-pyridine) ligand-iron complexes as anolytes for flow battery applications. *Dalt Trans.* 2017;46(47):16439–45.
16. Cabrera PJ, Yang X, Suttill JA, Hawthorne KL, Brooner REM, Sanford MS, et al. Complexes containing redox noninnocent ligands for symmetric, multielectron transfer nonaqueous redox flow batteries. *J Phys Chem C.* 2015;119(28):15882–9.
17. Armstrong CG, Toghil KE. Cobalt(II) complexes with azole-pyridine type ligands for non-aqueous redox-flow batteries: Tunable electrochemistry via structural modification. *J Power Sources* [Internet]. 2017;349:121–9. Available from: <http://dx.doi.org/10.1016/j.jpowsour.2017.03.034>
18. Hu B, Liu TL. Two electron utilization of methyl viologen anolyte in nonaqueous organic redox flow battery. *J Energy Chem.* 2018;27(5):1326–32.
19. Huang J, Yang Z, Murugesan V, Walter E, Hollas A, Pan B, et al. Spatially Constrained Organic Diquat Anolyte for Stable Aqueous Flow Batteries. *ACS Energy Lett.* 2018;3(10):2533–8.
20. Hu B, Debruler C, Rhodes Z, Liu T, Hu B, Debruler C, et al. A Long Cycling Aqueous Organic Redox Flow Battery ( AORFB ) towards Sustainable and Safe Energy Storage. *J Am Chem Soc.* 2017;139(3):1207–14.
21. Hwang S, Kim H seung, Ryu JH, Oh SM. N-ferrocenylphthalimide; A single redox couple formed by attaching a ferrocene moiety to phthalimide for non-aqueous flow batteries. *J Power Sources* [Internet]. 2018;395(March):60–5. Available from: <https://doi.org/10.1016/j.jpowsour.2018.05.053>
22. Li W, Kerr E, Goulet MA, Fu HC, Zhao Y, Yang Y, et al. A Long Lifetime Aqueous Organic Solar Flow Battery. *Adv Energy Mater.* 2019;1900918:1–8.

23. Beh ES, De Porcellinis D, Gracia RL, Xia KT, Gordon RG, Aziz MJ. A neutral pH aqueous organic- organometallic redox flow battery with extremely high capacity retention. *ACS Energy Lett.* 2017;2(3):639–44.
24. Zhu Y, Yang F, Niu Z, Wu H, He Y, Zhu H, et al. Enhanced cyclability of organic redox flow batteries enabled by an artificial bipolar molecule in neutral aqueous electrolyte. *J Power Sources* [Internet]. 2019;417(February):83–9. Available from: <https://doi.org/10.1016/j.jpowsour.2019.02.021>
25. Ding Y, Zhao Y, Li Y, Goodenough JB, Yu G. A high-performance all-metallocene-based, non-aqueous redox flow battery. *Energy Environ Sci.* 2017;10(2):491–7.
26. Kosswattaarachchi AM, Cook TR. Concentration-dependent charge-discharge characteristics of non-aqueous redox flow battery electrolyte combinations. *Electrochim Acta* [Internet]. 2018;261:296–306. Available from: <https://doi.org/10.1016/j.electacta.2017.12.131>
27. Cappillino PJ, Pratt HD, Hudak NS, Tomson NC, Anderson TM, Anstey MR. Application of Redox Non-Innocent Ligands to Non-Aqueous Flow Battery Electrolytes. *Adv Energy Mater.* 2014;4(1):2–6.
28. Robb BH, Farrell JM, Marshak MP. Chelated Chromium Electrolyte Enabling High-Voltage Aqueous Flow Batteries. *Joule* [Internet]. 2019;1–10. Available from: <https://doi.org/10.1016/j.joule.2019.07.002>
29. Wen YH, Zhang HM, Qian P, Zhou HT, Zhao P, Yi BL, et al. Studies on iron (Fe<sup>3+</sup>/Fe<sup>2+</sup>)-Complex/bromine (Br<sub>2</sub>/Br<sup>-</sup>) redox flow cell in sodium acetate solution. *J Electrochem Soc.* 2006;153(5):929–34.
30. Lê A, Floner D, Roisnel T, Cador O, Chancelier L, Geneste F. Highly soluble Fe(III)-triethanolamine complex relevant for redox flow batteries. *Electrochim Acta.* 2019;301:472–7.
31. Kim HS, Hwang S, Mun J, Park H, Ryu JH, Oh SM. Counter anion effects on the energy density of Ni(II)-chelated tetradentate azamacrocyclic complex cation as single redox couple for non-aqueous flow batteries. *Electrochim Acta.* 2019;308(I):227–30.
32. Hwang S, Kim H seung, Ryu JH, Oh SM. Ni(II)-chelated thio-crown complex as a single redox couple for non-aqueous flow batteries. *Electrochim Commun* [Internet]. 2017;85(I):36–9. Available from: <http://dx.doi.org/10.1016/j.elecom.2017.10.015>
33. Wedege K, Azevedo J, Khataee A, Bontien A, Mendes A. Direct Solar Charging of an Organic–Inorganic, Stable, and Aqueous Alkaline Redox Flow Battery with a Hematite Photoanode. *Angew Chemie - Int Ed.* 2016;55(25):7142–7.
34. Tong L, Goulet M-A, Tabor DP, Kerr EF, De Porcellinis D, Fell EM, et al. Molecular Engineering of an Alkaline Naphthoquinone Flow Battery. *ACS Energy Lett.* 2019;1880–7.

35. Wang C, Yang Z, Wang Y, Zhao P, Yan W, Zhu G, et al. High-Performance Alkaline Organic Redox Flow Batteries Based on 2-Hydroxy-3-carboxy-1,4-naphthoquinone. *ACS Energy Lett.* 2018;3(10):2404–9.
36. Lin K, Chen Q, Gerhardt MR, Tong L, Kim SB, Eisenach L, et al. Alkaline quinone flow battery. *Science* (80- ). 2015;349(6255):1529–32.
37. Yang Z, Tong L, Tabor DP, Beh ES, Goulet MA, De Porcellinis D, et al. Alkaline Benzoquinone Aqueous Flow Battery for Large-Scale Storage of Electrical Energy. *Adv Energy Mater.* 2018;8(8):1–9.
38. Wedege K, Dražević E, Konya D, Bentien A. Organic Redox Species in Aqueous Flow Batteries: Redox Potentials, Chemical Stability and Solubility. *Sci Rep* [Internet]. 2016;6(December):1–13. Available from: <http://dx.doi.org/10.1038/srep39101>
39. Yang B, Hooper-Burkhardt L, Krishnamoorthy S, Murali A, Prakash GKS, Narayanan SR. High-Performance Aqueous Organic Flow Battery with Quinone-Based Redox Couples at Both Electrodes. *J Electrochem Soc* [Internet]. 2016 May 10;163(7):A1442–9. Available from: <https://iopscience.iop.org/article/10.1149/2.1371607jes>
40. Gerken JB, Anson CW, Preger Y, Symons PG, Genders JD, Qiu Y, et al. Comparison of Quinone-Based Catholytes for Aqueous Redox Flow Batteries and Demonstration of Long-Term Stability with Tetrasubstituted Quinones. *Adv Energy Mater* [Internet]. 2020 May 15;10(20):2000340. Available from: <https://onlinelibrary.wiley.com/doi/10.1002/aenm.202000340>
41. Er S, Suh C, Marshak MP, Aspuru-Guzik A. Computational design of molecules for an all-quinone redox flow battery. *Chem Sci.* 2015;6(2):885–93.
42. Carney TJ, Collins SJ, Moore JS, Brushett FR. Concentration-Dependent Dimerization of Anthraquinone Disulfonic Acid and Its Impact on Charge Storage. *Chem Mater* [Internet]. 2017 Jun 13;29(11):4801–10. Available from: <https://pubs.acs.org/doi/10.1021/acs.chemmater.7b00616>
43. Liu T, Wei X, Nie Z, Sprenkle V, Wang W. A Total Organic Aqueous Redox Flow Battery Employing a Low Cost and Sustainable Methyl Viologen Anolyte and 4-HO-TEMPO Catholyte. *Adv Energy Mater.* 2016;6(3).
44. Debruler C, Hu B, Moss J, Luo J, Liu TL. A Sulfonate-Functionalized Viologen Enabling Neutral Cation Exchange, Aqueous Organic Redox Flow Batteries toward Renewable Energy Storage. *ACS Energy Lett.* 2018;3(3):663–8.
45. Liu Y, Goulet MA, Tong L, Liu Y, Ji Y, Wu L, et al. A Long-Lifetime All-Organic Aqueous Flow Battery Utilizing TMAP-TEMPO Radical. *Chem* [Internet]. 2019;5(7):1861–70. Available from: <https://doi.org/10.1016/j.chempr.2019.04.021>
46. Soule BP, Hyodo F, Matsumoto K ichiro, Simone NL, Cook JA, Krishna MC, et al. The chemistry and biology of nitroxide compounds.

Free Radic Biol Med. 2007;42(11):1632–50.

47. Wei X, Xu W, Vijayakumar M, Cosimbescu L, Liu T, Sprenkle V, et al. TEMPO-based catholyte for high-energy density nonaqueous redox flow batteries. *Adv Mater*. 2014;26(45):7649–53.
48. Fernandez MJF, Sato H. Solvent effect on (2,2,6,6-Tetramethylpiperidine-1-yl)oxyl (TEMPO): A RISM-SCF-SEDD study. *Theor Chem Acc*. 2011;130(2–3):299–304.
49. Orita A, Verde MG, Sakai M, Meng YS. The impact of pH on side reactions for aqueous redox flow batteries based on nitroxyl radical compounds. *J Power Sources* [Internet]. 2016;321:126–34. Available from: <http://dx.doi.org/10.1016/j.jpowsour.2016.04.136>
50. Chang Z, Henkensmeier D, Chen R. One-Step Cationic Grafting of 4-Hydroxy-TEMPO and its Application in a Hybrid Redox Flow Battery with a Crosslinked PBI Membrane. *ChemSusChem*. 2017;10(16):3193–7.
51. Chang Z, Henkensmeier D, Chen R. Shifting redox potential of nitroxyl radical by introducing an imidazolium substituent and its use in aqueous flow batteries. *J Power Sources* [Internet]. 2019;418(January):11–6. Available from: <https://doi.org/10.1016/j.jpowsour.2019.02.028>
52. Zhang J, Huang J, Robertson LA, Shkrob IA, Zhang L. Comparing calendar and cycle life stability of redox active organic molecules for nonaqueous redox flow batteries. *J Power Sources* [Internet]. 2018;397(July):214–22. Available from: <https://doi.org/10.1016/j.jpowsour.2018.07.001>
53. Wei X, Xu W, Huang J, Zhang L, Walter E, Lawrence C, et al. Radical Compatibility with Nonaqueous Electrolytes and Its Impact on an All-Organic Redox Flow Battery. *Angew Chemie - Int Ed*. 2015;54(30):8684–7.
54. Xing X, Liu Q, Xu W, Liang W, Liu J, Wang B, et al. All-Liquid Electroactive Materials for High Energy Density Organic Flow Battery. *ACS Appl Energy Mater*. 2019;2(4):2364–9.
55. Teng X, Dai J, Su J, Zhu Y, Liu H, Song Z. A high performance polytetrafluoroethylene/Nafion composite membrane for vanadium redox flow battery application. *J Power Sources*. 2013;240:131–9.
56. Teng X, Zhao Y, Xi J, Wu Z, Qiu X, Chen L. Nafion/organic silica modified TiO<sub>2</sub> composite membrane for vanadium redox flow battery via in situ sol-gel reactions. *J Memb Sci*. 2009;341(1–2):149–54.
57. Mai Z, Zhang H, Li X, Bi C, Dai H. Sulfonated poly(tetramethyldiphenyl ether ether ketone) membranes for vanadium redox flow battery application. *J Power Sources* [Internet]. 2011;196(1):482–7. Available from: <http://dx.doi.org/10.1016/j.jpowsour.2010.07.028>

58. Xi J, Wu Z, Qiu X, Chen L. Nafion/SiO<sub>2</sub> hybrid membrane for vanadium redox flow battery. *J Power Sources*. 2007;166(2):531–6.
59. Wang N, Peng S, Lu D, Liu S, Liu Y, Huang K. Nafion/TiO<sub>2</sub> hybrid membrane fabricated via hydrothermal method for vanadium redox battery. *J Solid State Electrochem*. 2012;16(4):1577–84.
60. Li Z, Dai W, Yu L, Xi J, Qiu X, Chen L. Sulfonated poly(ether ether ketone)/mesoporous silica hybrid membrane for high performance vanadium redox flow battery. *J Power Sources* [Internet]. 2014;257:221–9. Available from: <http://dx.doi.org/10.1016/j.jpowsour.2014.01.127>
61. Dai W, Yu L, Li Z, Yan J, Liu L, Xi J, et al. Sulfonated Poly(Ether Ether Ketone)/Graphene composite membrane for vanadium redox flow battery. *Electrochim Acta* [Internet]. 2014;132:200–7. Available from: <http://dx.doi.org/10.1016/j.electacta.2014.03.156>
62. Luo Q, Zhang H, Chen J, You D, Sun C, Zhang Y. Preparation and characterization of Nafion/SPEEK layered composite membrane and its application in vanadium redox flow battery. *J Memb Sci*. 2008;325(2):553–8.
63. Chen D, Kim S, Li L, Yang G, Hickner MA. Stable fluorinated sulfonated poly(arylene ether) membranes for vanadium redox flow batteries. *RSC Adv*. 2012;2(21):8087–94.
64. Yun S, Parrondo J, Ramani V. A vanadium-cerium redox flow battery with an anion-exchange membrane separator. *Chempluschem*. 2015;80(2):412–21.
65. Zhang B, Zhang S, Weng Z, Wang G, Zhang E, Yu P, et al. Quaternized adamantane-containing poly(aryl ether ketone) anion exchange membranes for vanadium redox flow battery applications. *J Power Sources* [Internet]. 2016;325:801–7. Available from: <http://dx.doi.org/10.1016/j.jpowsour.2016.06.101>
66. Zhang S, Zhang B, Zhao G, Jian X. Anion exchange membranes from brominated poly(aryl ether ketone) containing 3,5-dimethyl phthalazinone moieties for vanadium redox flow batteries. *J Mater Chem A*. 2014;2(9):3083–91.
67. Chen D, Hickner MA, Agar E, Kumbur EC. Optimized anion exchange membranes for vanadium redox flow batteries. *ACS Appl Mater Interfaces*. 2013;5(15):7559–66.
68. Zhang F, Zhang H, Qu C. A dication cross-linked composite anion-exchange membrane for all-vanadium flow battery applications. *ChemSusChem*. 2013;6(12):2290–8.
69. Cha MS, Jeong HY, Shin HY, Hong SH, Kim TH, Oh SG, et al. Crosslinked anion exchange membranes with primary diamine-based crosslinkers for vanadium redox flow battery application. *J Power Sources* [Internet]. 2017;363:78–86. Available from: <http://dx.doi.org/10.1016/j.jpowsour.2017.07.068>

70. Ren J, Dong Y, Dai J, Hu H, Zhu Y, Teng X. A novel chloromethylated/quaternized poly(sulfone)/poly(vinylidene fluoride) anion exchange membrane with ultra-low vanadium permeability for all vanadium redox flow battery. *J Memb Sci* [Internet]. 2017;544(September):186–94. Available from: <http://dx.doi.org/10.1016/j.memsci.2017.09.015>
71. Park SG, Kwak NS, Hwang CW, Park HM, Hwang TS. Synthesis and characteristics of aminated vinylbenzyl chloride-co-styrene-co-hydroxyethyl acrylate anion-exchange membrane for redox flow battery applications. *J Memb Sci* [Internet]. 2012;423–424:429–37. Available from: <http://dx.doi.org/10.1016/j.memsci.2012.08.040>
72. Maurya S, Shin SH, Kim MK, Yun SH, Moon SH. Stability of composite anion exchange membranes with various functional groups and their performance for energy conversion. *J Memb Sci* [Internet]. 2013;443:28–35. Available from: <http://dx.doi.org/10.1016/j.memsci.2013.04.035>
73. Hwang CW, Park HM, Oh CM, Hwang TS, Shim J, Jin CS. Synthesis and characterization of vinylimidazole-co-trifluoroethylmethacrylate-co-divinylbenzene anion-exchange membrane for all-vanadium redox flow battery. *J Memb Sci* [Internet]. 2014;468:98–106. Available from: <http://dx.doi.org/10.1016/j.memsci.2014.05.050>
74. Khataee A, Pan D, Olsson JS, Jannasch P, Lindström RW. Asymmetric cycling of vanadium redox flow batteries with a poly(arylene piperidinium)-based anion exchange membrane. *J Power Sources* [Internet]. 2021 Jan;483:229202. Available from: <https://linkinghub.elsevier.com/retrieve/pii/S0378775320314920>
75. Gong SJ, Kim D, Cho E, Hwang SS, Won J. A Chitosan/Urushi Anion Exchange Membrane for a Non-aqueous Redox Flow Battery. *ChemistrySelect*. 2017;2(5):1843–9.
76. Cho E, Won J. Novel composite membrane coated with a poly(diallyldimethylammonium chloride)/urushi semi-interpenetrating polymer network for non-aqueous redox flow battery application. *J Power Sources* [Internet]. 2016;335:12–9. Available from: <http://dx.doi.org/10.1016/j.jpowsour.2016.10.020>
77. Mohammadi T, Skyllas Kazacos M. Modification of anion-exchange membranes for vanadium redox flow battery applications. *J Power Sources*. 1996;63(2):179–86.
78. Liu S, Wang L, Li D, Liu B, Wang J, Song Y. Novel amphoteric ion exchange membranes by blending sulfonated poly(ether ether ketone)/quaternized poly(ether imide) for vanadium redox flow battery applications. *J Mater Chem A* [Internet]. 2015;3(34):17590–7. Available from: <http://dx.doi.org/10.1039/C5TA04351D>
79. Dai J, Dong Y, Gao P, Ren J, Yu C, Hu H, et al. A sandwiched bipolar membrane for all vanadium redox flow battery with high coulombic efficiency. *Polymer (Guildf)* [Internet]. 2018;140:233–9. Available from: <https://doi.org/10.1016/j.polymer.2018.02.051>



80. Gan R, Ma Y, Li S, Zhang F, He G. Facile fabrication of amphoteric semi-interpenetrating network membranes for vanadium flow battery applications. *J Energy Chem* [Internet]. 2018;27(4):1189–97. Available from: <https://doi.org/10.1016/j.jechem.2017.09.017>
81. Yan X, Zhang C, Dai Y, Zheng W, Ruan X, He G. A novel imidazolium-based amphoteric membrane for high-performance vanadium redox flow battery. *J Memb Sci* [Internet]. 2017;544(April):98–107. Available from: <http://dx.doi.org/10.1016/j.memsci.2017.09.025>
82. Sharma PP, Paul A, Srivastava DN, Kulshrestha V. Semi-Interpenetrating Network-Type Cross-Linked Amphoteric Ion-Exchange Membrane Based on Styrene Sulfonate and Vinyl Benzyl Chloride for Vanadium Redox Flow Battery. *ACS Omega*. 2018;3(8):9872–9.
83. Noh C, Jung M, Henkensmeier D, Nam SW, Kwon Y. Vanadium Redox Flow Batteries Using meta-Polybenzimidazole-Based Membranes of Different Thicknesses. *ACS Appl Mater Interfaces*. 2017;9(42):36799–809.
84. Liao JB, Lu MZ, Chu YQ, Wang JL. Ultra-low vanadium ion diffusion amphoteric ion-exchange membranes for all-vanadium redox flow batteries. *J Power Sources*. 2015;282:241–7.
85. Chromik A, dos Santos AR, Turek T, Kunz U, Häring T, Kerres J. Stability of acid-excess acid-base blend membranes in all-vanadium redox-flow batteries. *J Memb Sci* [Internet]. 2015;476:148–55. Available from: <http://dx.doi.org/10.1016/j.memsci.2014.11.036>
86. Chen D, Chen X, Ding L, Li X. Advanced acid-base blend ion exchange membranes with high performance for vanadium flow battery application. *J Memb Sci* [Internet]. 2018;553:25–31. Available from: <https://doi.org/10.1016/j.memsci.2018.02.039>
87. Oldenburg FJ, Nilsson E, Schmidt TJ, Gubler L. Tackling Capacity Fading in Vanadium Redox Flow Batteries with Amphoteric Polybenzimidazole/Nafion Bilayer Membranes. *ChemSusChem*. 2019;12(12):2620–7.
88. Xia Z, Ying L, Fang J, Du YY, Zhang WM, Guo X, et al. Preparation of covalently cross-linked sulfonated polybenzimidazole membranes for vanadium redox flow battery applications. *J Memb Sci*. 2017;525(May 2016):229–39.
89. Yuan J, Yu C, Peng J, Wang Y, Ma J, Qiu J, et al. Facile synthesis of amphoteric ion exchange membrane by radiation grafting of sodium styrene sulfonate and N,N-dimethylaminoethyl methacrylate for vanadium redox flow battery. *J Polym Sci Part A Polym Chem*. 2013;51(24):5194–202.
90. Liu S, Li D, Wang L, Yang H, Han X, Liu B. Ethylenediamine-functionalized graphene oxide incorporated acid-base ion exchange membranes for vanadium redox flow battery. *Electrochim Acta* [Internet]. 2017;230:204–11. Available from: <http://dx.doi.org/10.1016/j.electacta.2017.01.170>
91. Cao L, Sun Q, Gao Y, Liu L, Shi H. Novel acid-base hybrid membrane based on amine-functionalized reduced graphene oxide and sulfonated polyimide for vanadium redox flow battery. *Electrochim Acta* [Internet]. 2015;158:24–34. Available from:

<http://dx.doi.org/10.1016/j.electacta.2015.01.159>

92. Liu S, Wang L, Ding Y, Liu B, Han X, Song Y. Novel sulfonated poly (ether ether keton)/polyetherimide acid-base blend membranes for vanadium redox flow battery applications. *Electrochim Acta* [Internet]. 2014;130:90–6. Available from: <http://dx.doi.org/10.1016/j.electacta.2014.02.144>
93. Wang Y, Wang S, Xiao M, Song S, Han D, Hickner MA, et al. Amphoteric ion exchange membrane synthesized by direct polymerization for vanadium redox flow battery application. *Int J Hydrogen Energy* [Internet]. 2014;39(28):16123–31. Available from: <http://dx.doi.org/10.1016/j.ijhydene.2014.04.049>
94. Zhang H, Zhang H, Li X, Mai Z, Zhang J. Nanofiltration (NF) membranes: The next generation separators for all vanadium redox flow batteries (VRBs)? *Energy Environ Sci*. 2011;4(5):1676–9.
95. Cao J, Zhang H, Xu W, Li X. Poly(vinylidene fluoride) porous membranes precipitated in water/ethanol dual-coagulation bath: The relationship between morphology and performance in vanadium flow battery. *J Power Sources* [Internet]. 2014;249:84–91. Available from: <http://dx.doi.org/10.1016/j.jpowsour.2013.10.069>
96. Yang R, Xu Z, Yang S, Michos I, Li LF, Angelopoulos AP, et al. Nonionic zeolite membrane as potential ion separator in redox-flow battery. *J Memb Sci* [Internet]. 2014;450:12–7. Available from: <http://dx.doi.org/10.1016/j.memsci.2013.08.048>
97. Yuan Z, Zhu X, Li M, Lu W, Li X, Zhang H. A Highly Ion-Selective Zeolite Flake Layer on Porous Membranes for Flow Battery Applications. *Angew Chemie - Int Ed*. 2016;55(9):3058–62.
98. Yan L, Li D, Li S, Xu Z, Dong J, Jing W, et al. Balancing Osmotic Pressure of Electrolytes for Nanoporous Membrane Vanadium Redox Flow Battery with a Draw Solute. *ACS Appl Mater Interfaces*. 2016;8(51):35289–97.
